# Supplementary material for: The Tree versus the Forest: The Fungal Tree of Life and the Topological Diversity within the Yeast Phylome
Source: PLOS journal article supplement (doi:10.1371/journal.pone.0004357), 2009-02-03

**Figure S3 T12b**

Phylogenetic tree representing the evolutionary relationships among 12 fungal species, sampled from the fungal groups. The tree was build using ML analysis on a concatenated alignment of 217 widespread proteins. Numbers indicate phylome and bootstrap supports, as in figure 1.

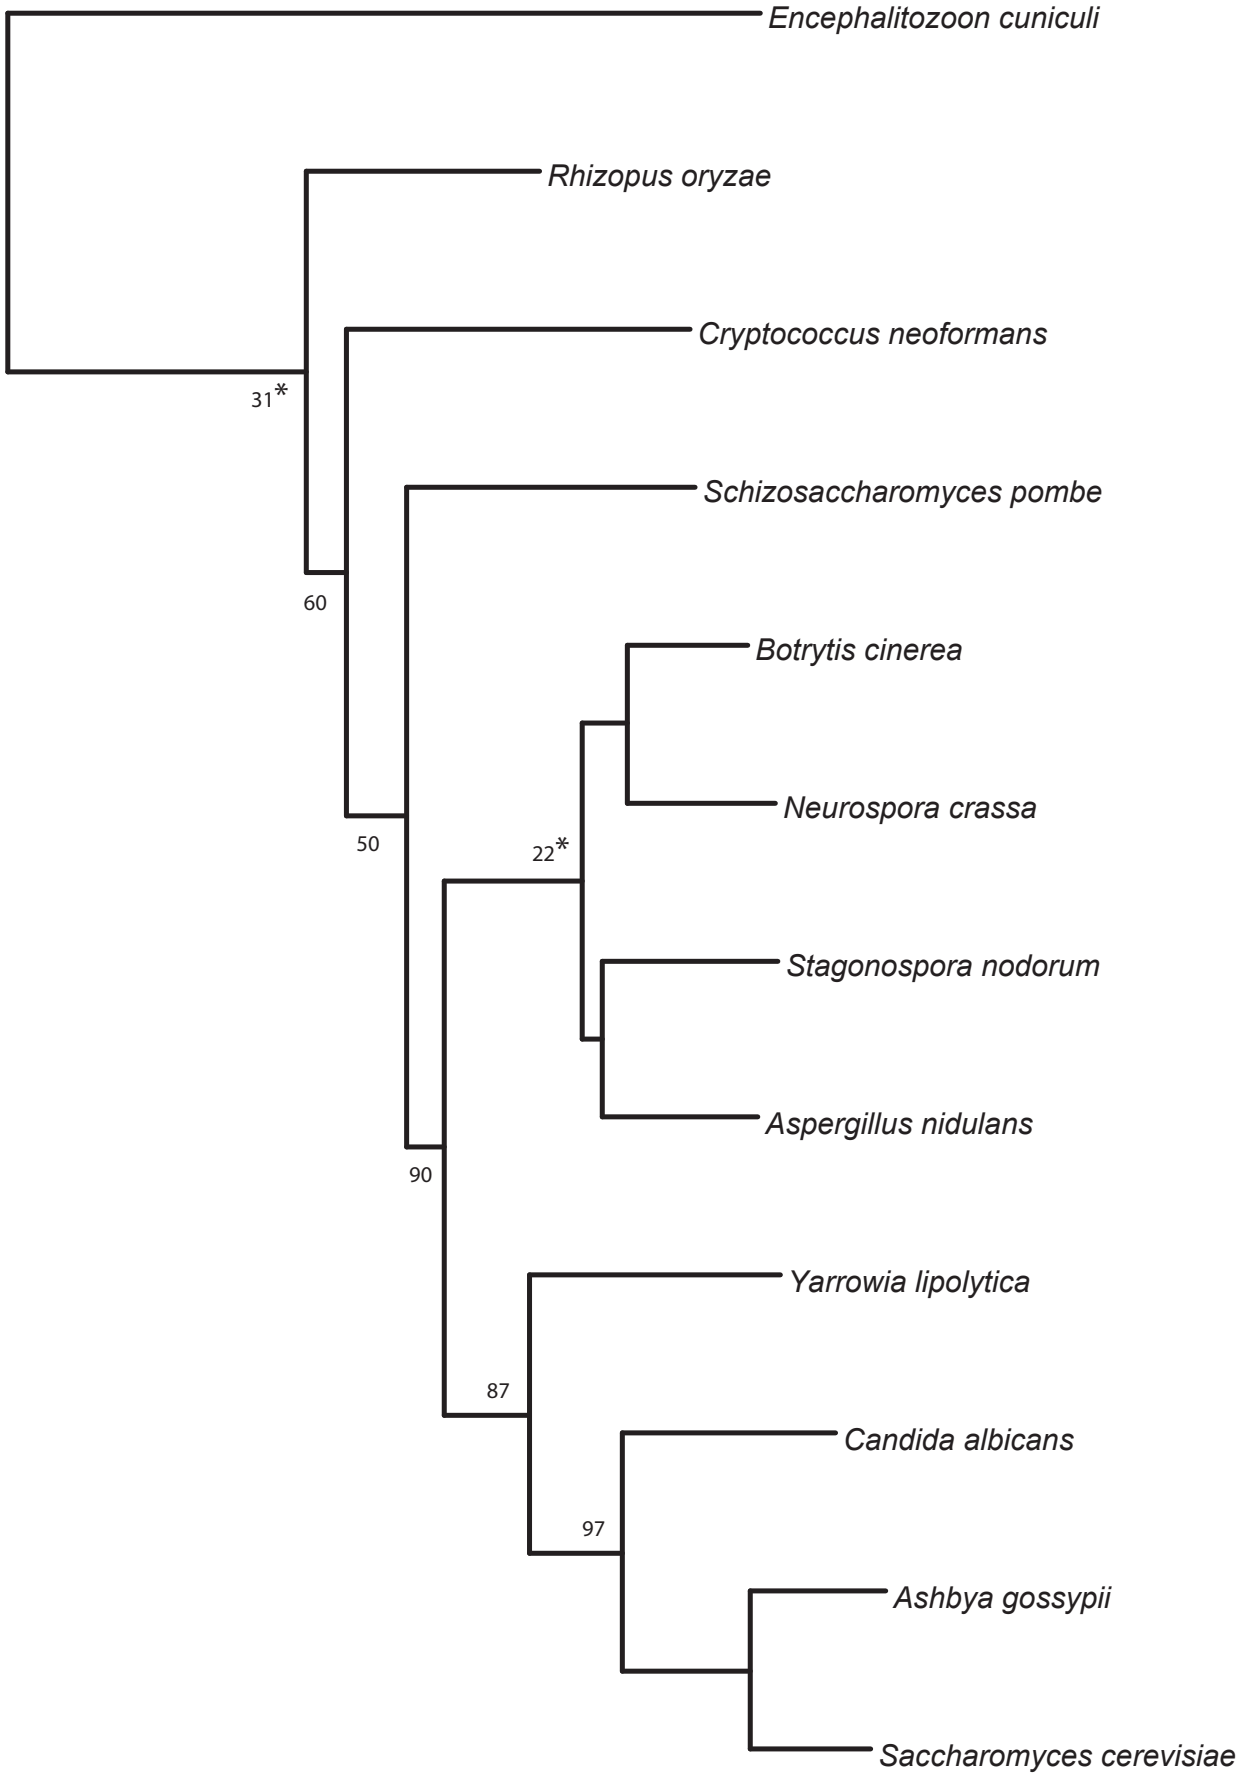

Supplement: S3 (10.1371/journal.pone.0004357.s003) [file journal.pone.0004357.s003]
