# Supplementary material for: The Tree versus the Forest: The Fungal Tree of Life and the Topological Diversity within the Yeast Phylome
Source: PLOS journal article supplement (doi:10.1371/journal.pone.0004357), 2009-02-03

#### **Figure S4 Branch support and phylome vs ST topological congruence**

Percentage of trees in the phylome that are fully compatible with the topology of T60 (Y axis), at different statistical support thresholds in the nodes considered (X axis). The statistical support used is the minimum value of the approximate likelihood as computed by the Chi2-based parametric methodology or the non-parametric branch support based on a Shimodaira-Hasenawa-like procedure (option -3 in PhyML aLRT). These methodologies are described in [1]. The nodes with a statistical support lower than the given threshold were collapsed. We only considered trees in which less than 50% of the nodes were collapsed.

1. Anisimova M, Gascuel O (2006) Approximate likelihood-ratio test for branches: A fast, accurate, and powerful alternative. *Syst Biol* 55: 539-552.

# S4.-

Statistical support influence on tree congruence  
(Only trees with less than 50% of the branches collapsed)

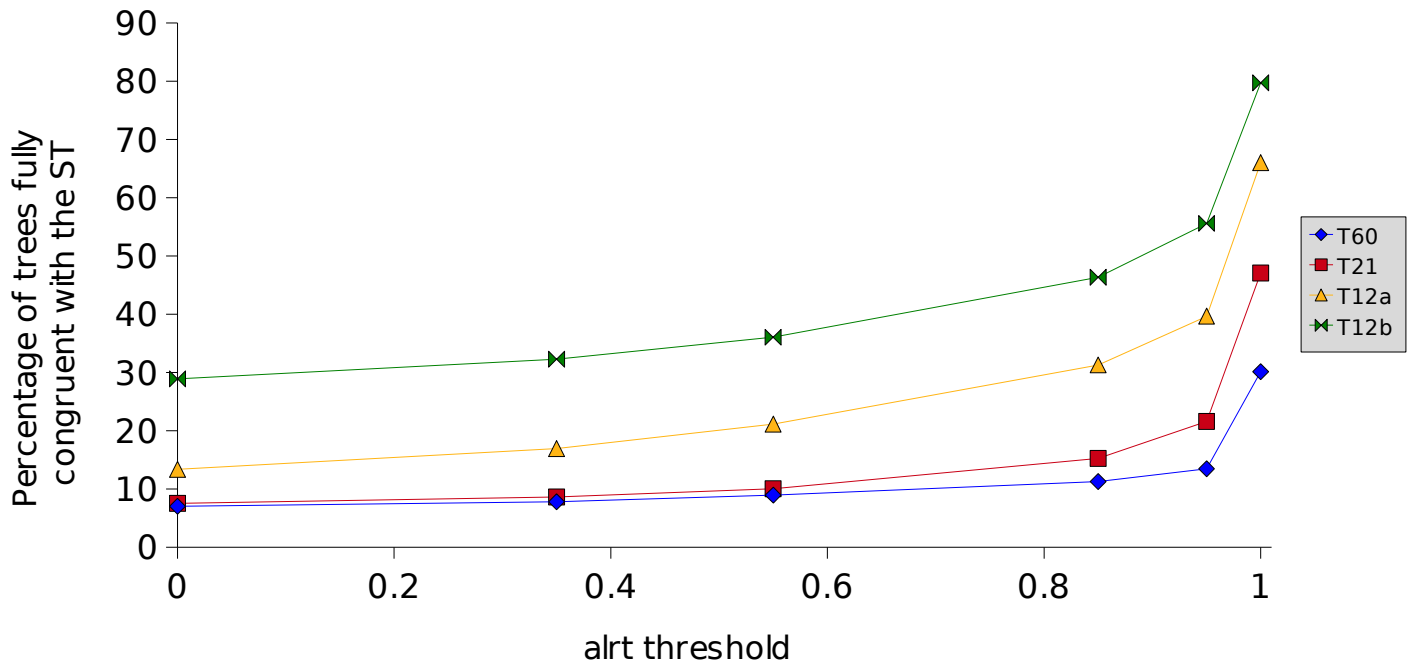

Supplement: S4 (10.1371/journal.pone.0004357.s004) [file journal.pone.0004357.s004]
